# Supplementary material for: Users, Uses, and Effects of Social Media in Dietetic Practice: Scoping Review of the Quantitative and Qualitative Evidence
Source: PubMed Central journal article supplement (PMC5840482; doi:10.2196/jmir.9230), 2018-02-20
Supplement: jmir_v20i2e55_app3.pdf [file jmir_v20i2e55_app3.pdf]

Multimedia Appendix 3. Types of outcomes assessed in intervention studies using social media comparing single or multiple intervention groups with a control group with no social media access (N=14 studies).

| Outcomes <sup>a</sup>                     |                                                                                                 | Number of studies in which the effect is reported as positive | Number of studies in which the effect is reported as neutral | Number of studies in which the effect is reported as negative | Number of studies in which the effect is reported as mixed |
|-------------------------------------------|-------------------------------------------------------------------------------------------------|---------------------------------------------------------------|--------------------------------------------------------------|---------------------------------------------------------------|------------------------------------------------------------|
|                                           |                                                                                                 |                                                               |                                                              |                                                               |                                                            |
| <b>Users' knowledge</b>                   |                                                                                                 |                                                               |                                                              |                                                               |                                                            |
| <b>Self-care knowledge</b>                |                                                                                                 |                                                               |                                                              |                                                               |                                                            |
|                                           | General nutrition knowledge <sup>b</sup>                                                        | 1 [58]                                                        |                                                              |                                                               |                                                            |
|                                           | Sports nutrition knowledge <sup>b</sup>                                                         |                                                               | 1 [58]                                                       |                                                               |                                                            |
| <b>Users' experience of care</b>          |                                                                                                 |                                                               |                                                              |                                                               |                                                            |
|                                           | Quality of life                                                                                 |                                                               | 1 [48]                                                       |                                                               | 1 [44]                                                     |
|                                           | Self-efficacy                                                                                   |                                                               | 1 [58]                                                       |                                                               |                                                            |
| <b>Users' health behaviors and status</b> |                                                                                                 |                                                               |                                                              |                                                               |                                                            |
| <b>Health related lifestyles</b>          |                                                                                                 |                                                               |                                                              |                                                               |                                                            |
| <b>Dietary intakes<sup>b</sup></b>        |                                                                                                 |                                                               |                                                              |                                                               |                                                            |
|                                           | Vegetables <sup>b</sup>                                                                         | 2 [18,55]                                                     | 3 [56,66,82]                                                 |                                                               | 1 [44]                                                     |
|                                           | Fruits <sup>b</sup>                                                                             | 2 [18,82]                                                     | 2 [55,56]                                                    |                                                               | 2 [44,66]                                                  |
|                                           | Grain products <sup>b</sup>                                                                     |                                                               | 3 [18,44,66]                                                 |                                                               |                                                            |
|                                           | Milk and alternatives <sup>b</sup>                                                              |                                                               | 2 [18,44]                                                    |                                                               | 1 [66]                                                     |
|                                           | Meat and alternatives <sup>b</sup>                                                              |                                                               | 2 [18,44]                                                    |                                                               | 1 [66]                                                     |
|                                           | Ultra-processed foods (eg, energy-dense takeaway meals, sugar-sweetened beverages) <sup>b</sup> | 1 [55]                                                        | 2 [56,82]                                                    |                                                               | 1 [44]                                                     |
|                                           | Total energy <sup>b</sup>                                                                       |                                                               |                                                              |                                                               | 2 [44,79]                                                  |
|                                           | <b>Carbohydrates<sup>b</sup></b>                                                                |                                                               | 2 [44,79]                                                    |                                                               |                                                            |

|  |  |  |                                                                            |           |           |        |                        |
|--|--|--|----------------------------------------------------------------------------|-----------|-----------|--------|------------------------|
|  |  |  | Dietary fibers <sup>b</sup>                                                |           | 1 [44]    |        |                        |
|  |  |  | Sugar <sup>b</sup>                                                         |           | 1 [44]    |        |                        |
|  |  |  | Proteins <sup>b</sup>                                                      |           | 2 [44,79] |        |                        |
|  |  |  | <b>Fat<sup>b</sup></b>                                                     |           | 2 [44,79] |        |                        |
|  |  |  | Saturated fat <sup>b</sup>                                                 |           | 1 [44]    |        |                        |
|  |  |  | Unsaturated fat <sup>b</sup>                                               |           | 1 [44]    |        |                        |
|  |  |  | Monounsaturated fatty acids:<br>saturated fatty acids ratio <sup>b</sup>   |           | 1 [66]    |        |                        |
|  |  |  | Alcohol <sup>b</sup>                                                       |           | 2 [44,66] |        |                        |
|  |  |  | Sodium <sup>b</sup>                                                        |           | 1 [44]    |        |                        |
|  |  |  | Diet quality (eg, Mediterranean score) <sup>b</sup>                        |           | 2 [48,66] |        |                        |
|  |  |  | Dietary behaviors (eg, cognitive restraint,<br>disinhibition) <sup>b</sup> |           |           | 1 [46] | 2 [44,58]              |
|  |  |  | Physical activity <sup>b</sup>                                             |           | 2 [44,48] |        | 4<br>[55,56,79,8<br>2] |
|  |  |  | Sedentary activity/sitting time <sup>b</sup>                               |           | 2 [56,79] |        |                        |
|  |  |  | <b>Mental functioning</b>                                                  |           |           |        |                        |
|  |  |  | Depression symptoms <sup>b</sup>                                           |           | 1 [48]    |        |                        |
|  |  |  | <b>Clinical indicators</b>                                                 |           |           |        |                        |
|  |  |  | <b>Body weight/body mass index<sup>b</sup></b>                             | 2 [44,55] | 2 [18,56] |        | 3 [72,75,82]           |
|  |  |  | Gestational weight gain <sup>b</sup>                                       |           | 1 [79]    |        |                        |
|  |  |  | Waist circumference <sup>b</sup>                                           |           | 1 [18]    |        | 1 [72]                 |
|  |  |  | Arm circumference <sup>b</sup>                                             |           | 1 [72]    |        |                        |
|  |  |  | Total cholesterol <sup>b</sup>                                             | 1 [44]    | 1 [66]    |        |                        |
|  |  |  | High-density lipoprotein (HDL) cholesterol <sup>b</sup>                    |           | 2 [44,66] |        | 1 [66]                 |
|  |  |  | Low-density lipoprotein (LDL) cholesterol <sup>b</sup>                     |           | 2 [44,66] |        |                        |
|  |  |  | Total/HDL cholesterol ratio <sup>b</sup>                                   |           |           |        | 1 [66]                 |

|                           |                                                    |           |           |  |        |
|---------------------------|----------------------------------------------------|-----------|-----------|--|--------|
|                           | Triglycerides <sup>b</sup>                         |           | 2 [44,66] |  |        |
|                           | Insulin <sup>b</sup>                               |           | 1 [44]    |  |        |
|                           | Glucose/HbA1c <sup>b</sup>                         |           | 1 [44]    |  |        |
|                           | Blood pressure <sup>b</sup>                        | 1 [44]    |           |  | 1 [72] |
|                           | Heart rate <sup>b</sup>                            |           | 2 [44,72] |  |        |
|                           | Global health risk scores <sup>b</sup>             |           | 1 [48]    |  |        |
| <b>Others<sup>b</sup></b> |                                                    |           |           |  |        |
|                           | Compliance rates <sup>b</sup>                      | 2 [18,54] | 1 [82]    |  |        |
|                           | Participation rates/usage statistics               | 1 [18]    | 1 [48]    |  |        |
|                           | Attrition/retention rates <sup>b</sup>             | 2 [18,44] | 1 [54]    |  |        |
| <b>User perspectives</b>  |                                                    |           |           |  |        |
|                           | Intention to use                                   |           |           |  |        |
|                           | Satisfaction                                       | 1 [66]    |           |  |        |
|                           | Learning environment <sup>b</sup>                  |           |           |  | 1 [78] |
|                           | Learning process <sup>b</sup>                      |           |           |  | 1 [78] |
|                           | Application of professional knowledge <sup>b</sup> |           | 1 [78]    |  |        |
|                           | Professional knowledge <sup>b</sup>                | 1 [80]    | 1 [78]    |  |        |
|                           | Professional self-efficacy <sup>b</sup>            | 1 [80]    |           |  |        |
